# Supplementary material for: FMNL1 Exhibits Pro-Metastatic Activity via CXCR2 in Clear Cell Renal Cell Carcinoma
Source: PubMed Central journal article supplement (PMC7726248; doi:10.3389/fonc.2020.564614), 2020-11-26
Supplement: DataSheet_1.pdf [file DataSheet_1.pdf]

**Supplementary table 1. Association between FMNL1 expression and clinicopathological features of ccRCC patients in SYSUCC cohort.**

| Variable                    | Cases | FMNL1          |                 | P value      |
|-----------------------------|-------|----------------|-----------------|--------------|
|                             |       | Low expression | High expression |              |
| Fuhrman                     |       |                |                 | <b>0.013</b> |
| I                           | 46    | 27 (58.7%)     | 19 (41.3%)      |              |
| II                          | 182   | 83 (45.6%)     | 99 (54.4%)      |              |
| III                         | 59    | 20 (33.9%)     | 39 (66.1%)      |              |
| IV                          | 19    | 4 (21.1%)      | 15 (78.9%)      |              |
| Sarcomatoid differentiation |       |                |                 | 0.240        |
| No                          | 292   | 130 (44.5%)    | 162 (55.5%)     |              |
| Yes                         | 14    | 4 (28.6%)      | 10 (71.4%)      |              |
| Necrosis                    |       |                |                 | 0.272        |
| No                          | 228   | 104 (45.6%)    | 124 (54.4%)     |              |
| Yes                         | 78    | 30 (38.5%)     | 48 (61.5%)      |              |
| Lymph node invasion         |       |                |                 | <b>0.008</b> |
| No                          | 283   | 130 (45.9%)    | 153 (54.1%)     |              |
| Yes                         | 23    | 4 (17.4%)      | 19 (82.6%)      |              |
| Vascular invasion           |       |                |                 | 0.070        |
| No                          | 280   | 127 (45.4%)    | 153 (54.6%)     |              |
| Yes                         | 26    | 7 (26.9%)      | 19 (73.1%)      |              |
| T stage                     |       |                |                 | 0.184        |
| I                           | 205   | 95 (46.3%)     | 110 (53.7%)     |              |
| II                          | 64    | 29 (45.3%)     | 35 (54.7%)      |              |
| III                         | 29    | 8 (27.6%)      | 21 (72.4%)      |              |
| IV                          | 8     | 2 (25.0%)      | 6 (75.0%)       |              |

Supplementary figures

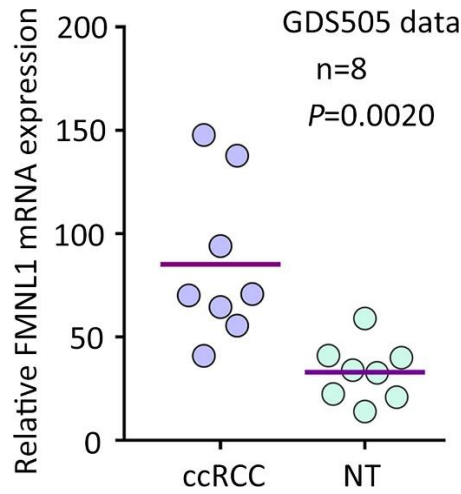

**Supplementary figure 1.** The expression of FMNL1 mRNA in public database (GDS505). A total of eight paired ccRCC tissues and corresponding nontumorous tissues were subjected to RNA sequencing. The relative expression of FMNL1 was indicated.

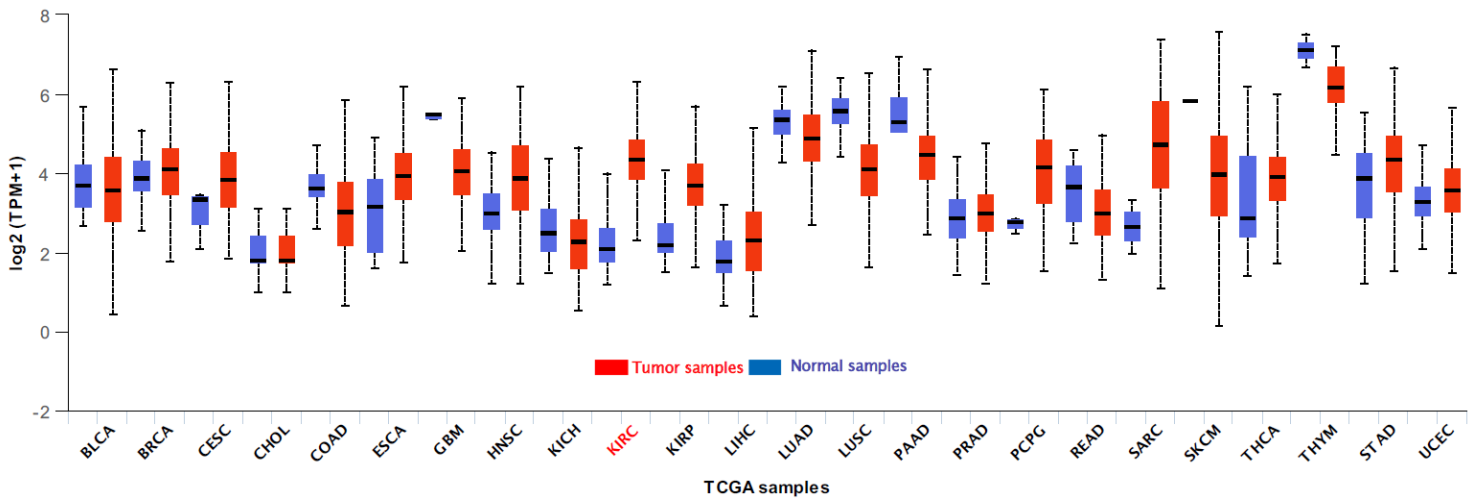

**Supplementary figure 2.** The expression of FMNL1 mRNA in TCGA cancers. The expression of FMNL1 mRNA in tumor tissues and nontumorous tissues was shown by Box plots.

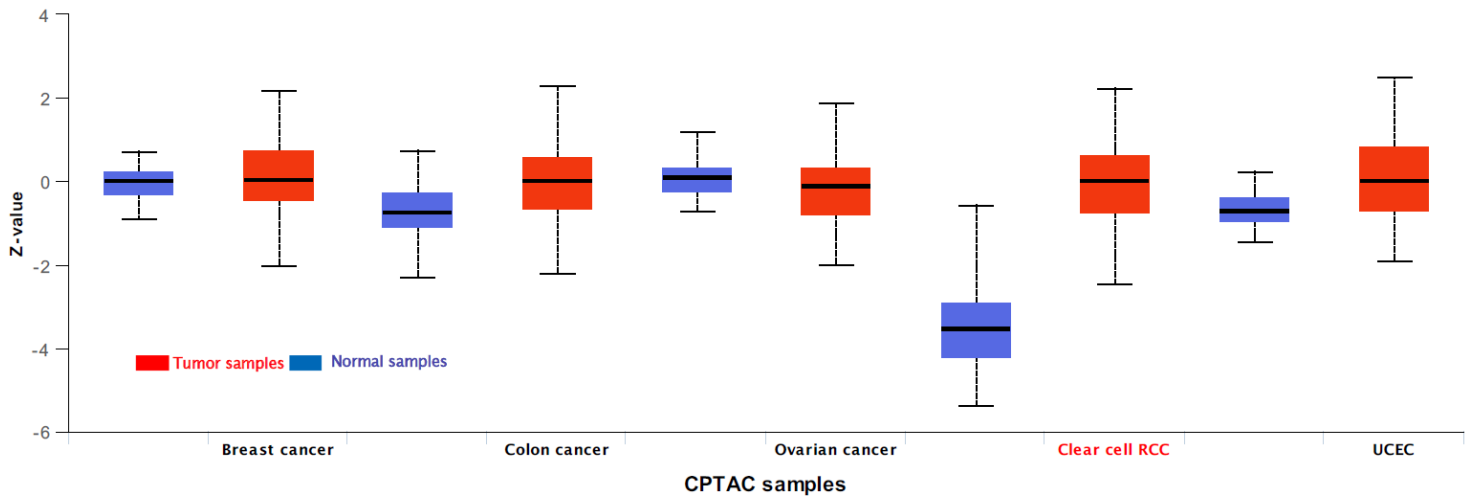

**Supplementary figure 3.** The expression of FMNL1 protein in Clinical Proteomic Tumor Analysis Consortium (CPTAC) database. The expression of FMNL1 protein in tumor tissues and nontumorous tissues was shown by Box plots.

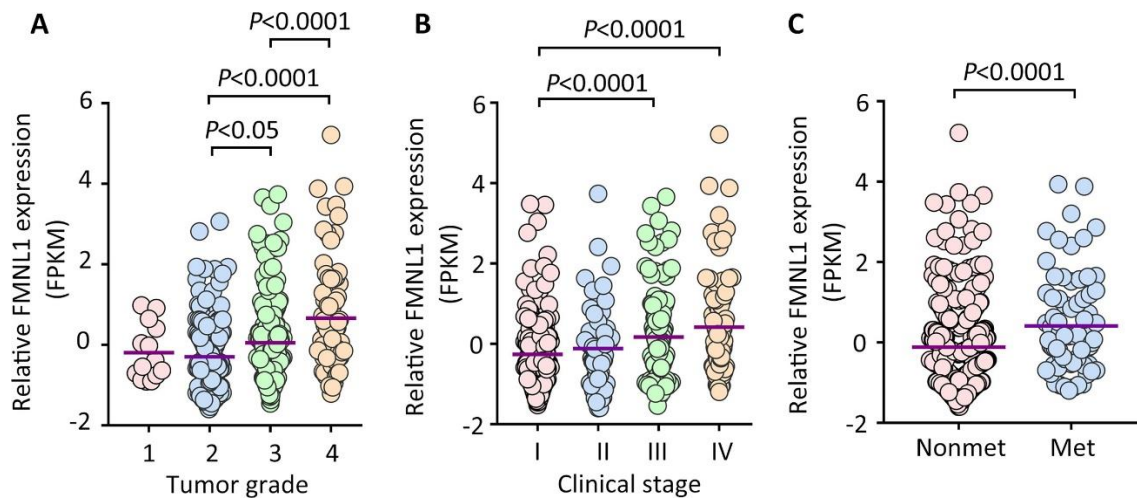

**Supplementary figure 4.** The correlation between FMNL1 expression and tumor stage, tumor grade and tumor metastasis of ccRCC patients in TCGA cohort. Patients were divided into groups according to tumor grades, clinical stages, and metastatic states. The expression of FMNL1 mRNA was indicated and compared.

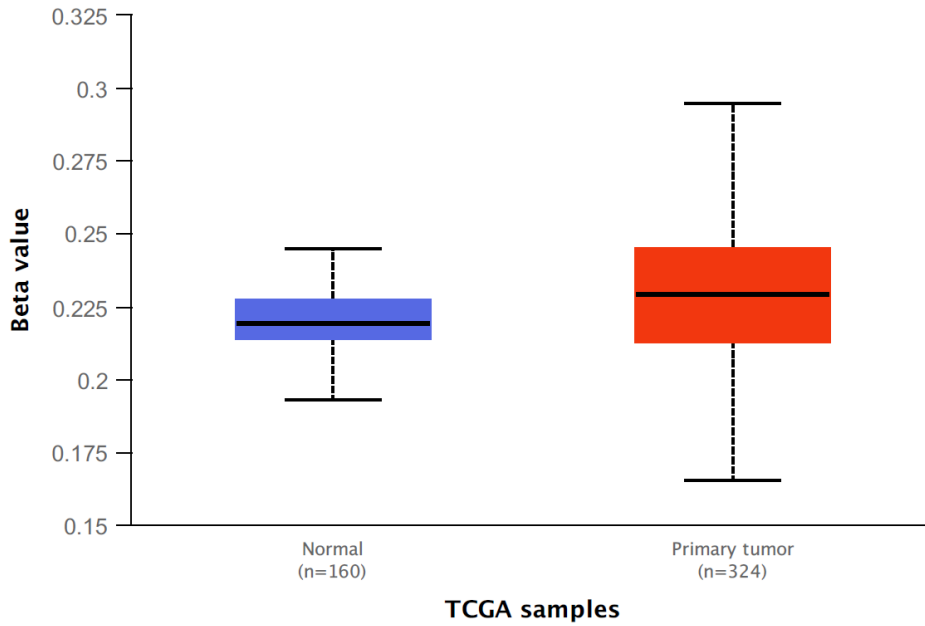

**Supplementary figure 5.** The status of promoter methylation of FMNL1 in TCGA cohort. The promoter methylation levels of FMNL1 in kidney cancer tissues and normal tissues were shown.

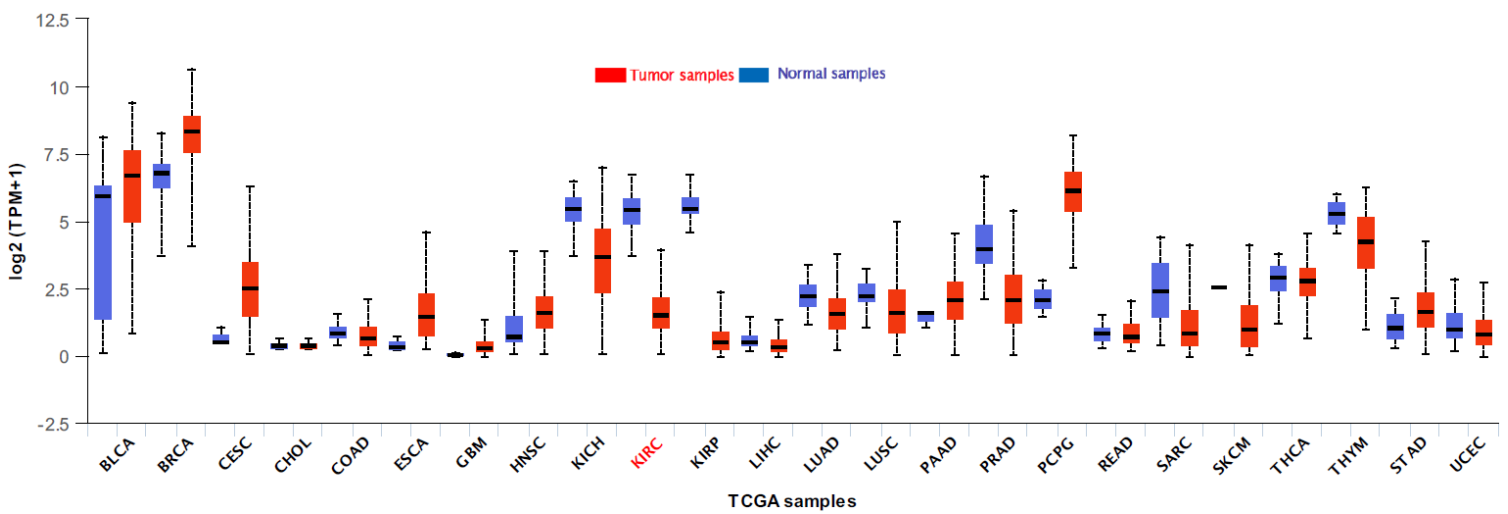

**Supplementary figure 6.** The expression of GATA3 mRNA in TCGA cancers. The expression of GATA3 mRNA in tumor tissues and nontumorous tissues was shown by Box plots.

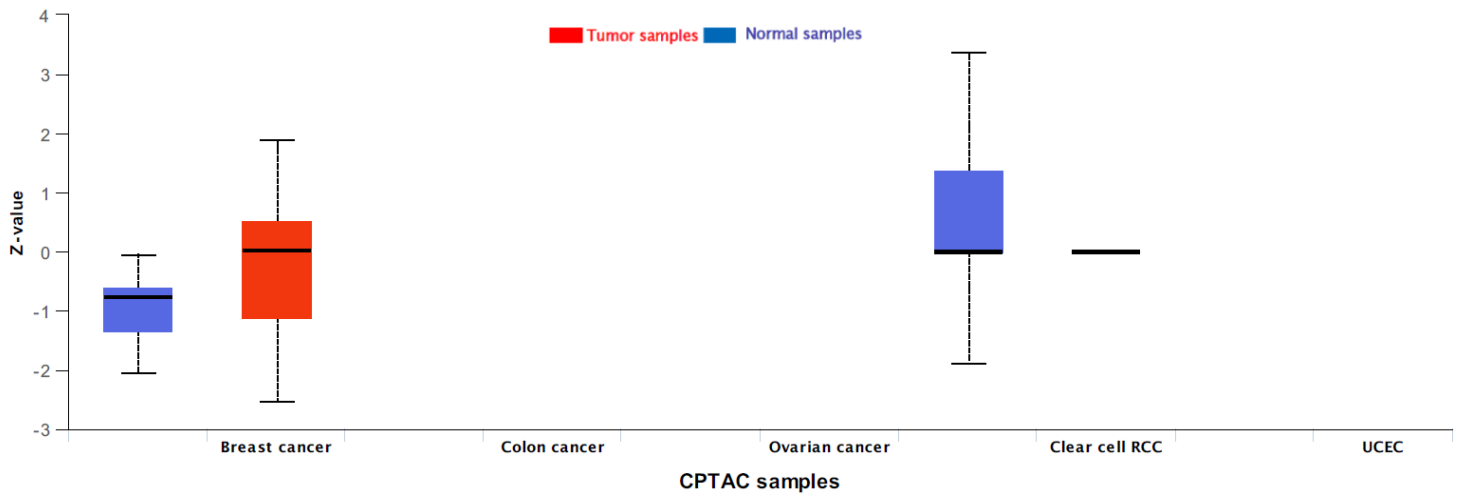

**Supplementary figure 7.** The expression of GATA3 protein in Clinical Proteomic Tumor Analysis Consortium (CPTAC) database.
